# Supplementary material for: Basal Metabolic Rate shapes the development and progression of hepatocellular carcinoma
Source: Research Square preprint supplement (doi:10.21203/rs.3.rs-6046205/v1), 2025-04-24
Supplement: Supplementary file 1 [file aa7e3b2e42e58b2aed999c9a.docx]

**Basal Metabolic Rate shapes the development and progression of hepatocellular carcinoma**

Sebastian Maciaka*, Diana Sawickab, Irena Kasackac, Lech Chyczewskid, Halina Carb,

Marek Konarzewskia

a Department of Evolutionary and Physiological Ecology, University of Bialystok, 15-245 Bialystok, Poland

b Department of Experimental Pharmacology, Medical University of Bialystok, 15-295 Bialystok, Poland

c Department of Histology and Cytophysiology, Medical University of Bialystok, 15-222 Bialystok, Poland

d University of Medical Sciences in Bialystok, 15-875 Bialystok, Poland

**Supplementary Information**

**Materials and Methods**

*Cell size and Histopathology*

Liver samples (with additional tumor sample, if observed) were fixed for 72 hours in 4% buffered formaldehyde, then dehydrated in ethanol and xylene, embedded in paraffin, and sliced into 5μm sections with a semi-automated rotary microtome (RM 2245, Leica Biosystems, Nussloch, Germany). Using standard protocol, the slides were stained with hematoxylin and eosin for histological examination. For hepatocyte size estimation, we measured the cross-sectional area (μm2) of 30 randomly chosen cells per mouse in the pericentral region of the lobules by outlining the edges of cells (areas were calculated automatically in all cases using MultiScan software). In consecutive time points of HCC development, we choose histologically change-less regions for cell size measurements. To determine a cancer progression in the obtained liver samples beside basic markers (main text), we have adopted seven, additional histological indicators, i.e., cytoplasm vacuolization, hepatocyte necrosis, hepatocyte apoptosis, pro-inflammatory cell influx, mitosis, hepatocyte atypia, and tumors. All features were visually assessed with the use of four steps scale, where: "0" refers to absent, "1" – little (up to 33% of the sample area), "2" – average (up to 66% of the sample area), and "3" – a lot of (up to 99% of the sample area). In all cases, except tumors, we have observed no vascular and bile duct epithelium changes. All sections were analyzed with the Leica D1000 light microscope and digitalized by a built-in ICC-50 camera (magnification 1000x; DM 1000, Leica Biosystems, Nussloch, Germany).

*Immunohistochemistry*

Immunostaining was done using the following protocol (Kasacka et al. 2018): paraffin-embedded sections were deparaffined and hydrated in pure alcohol. The sections of mice liver tissue were subjected to pretreatment in a pressure chamber and heated using Target Retrieval Solution Citrate pH=6.0 (S 2369; Agilent Technologies, Inc. Santa Clara, CA, USA). After cooling to room temperature, the sections were incubated with Dako REAL Peroxidase-Blocking Solution (S 2023; Agilent Technologies, Inc. Santa Clara, CA, USA). The slides with the β-catenin (primary antibody) (1:2000; ab32572, Abcam, Cambridge, UK) were incubated for 24 hours at +4ºC in a humidified chamber. The procedure was followed by incubation with secondary antibody (REAL™ EnVision™ Detection System, Peroxidase/DAB, Rabbit/Mouse detection kit (K5007; Agilent Technologies Denmark Ap/S, Produktionsvej 42, 2600 Glostrup, Denmark). The bound antibodies were visualized by incubation with DAB Flex chromogen. Finally, the liver sections were counterstained in hematoxylin QS (H-3404 Vector Laboratories, Burlingame, CA, USA) and observed under a light microscope. The liver sections were dehydrated, and the specificity of the antibodies was confirmed using a negative control, where the antibodies were replaced by Antibody Diluent (S3022; Agilent Technologies Denmark Ap/S, Produktionsvej 42, 2600 Glostrup, Denmark). The staining results were evaluated in an Olympus BX43 microscope with an Olympus DP12 camera.

**Results**

*Histopathological changes*

The degree of cytoplasmic vacuolization varied between metabolic lines. It was more incredible, especially in the L-BMR line, associated with high adiposity levels (fine and coarse droplets) of hepatocytes (Fig 1. in the main text). The severity of necrosis and apoptosis was moderate and differed between experimental groups with considerable increase in DEN-treated individuals, but not between metabolic lines, nor the time of experiment (S3 and S4 Tables). The difference in intensity of influx of pro-inflammatory cells was significant for metabolic lines and experimental groups and was particularly visible in the H-BMR line at weeks 35th and 45th (S3 and S4 Tables). Mitotic cells were rarely seen at analyzed histological slides in all studied groups and metabolic lines. We observed characteristic features of hepatocyte atypia in both lines in tumor-induced groups, increasing with the duration of the experiment, with the largest number of atypical cells at the last time point (S3 and S4 Tables). Atypical hepatocytes differ considerably in size, forming sinusoid, round or vesicular nuclei with distinct number of nucleoli. The cytoplasm tends to be abundant and intensively eosinophilic. The number of detected tumor cells increases with the duration of the experiment (S3 and S4 Tables). Although the process of cancerogenesis begins much earlier in the H-BMR line (we observed the first atypical cells at week 15th and a significant increase at weeks 35th and 45th, while in the L-BMR line, a significant increase was seen only at 45th week; (S3 Table), the between line variation was insignificant. At the end of the experiment, we found four individuals (half of the group) from the H-BMR line with neoplasms characterized by bizarre, anaplastic, often multinucleated cells described as hepatocellular carcinoma (HCC).

*Immunocytochemical analysis of β-catenin expression*

The β-catenin expression (brown color reaction) was demonstrated in liver sections of all mice used in the experiment (S1-3 Figures). However, the reaction's intensity and cellular location differed in individual study groups. In all control groups, the homogeneous form of β-catenin expression predominated (S1-3 A, B Figures). This protein was localized mainly in the cell membranes of hepatocytes; only occasionally a positive reaction was observed in the cytoplasm of single cells. Particularly intense expression is visible in cell membranes on the apical (vascular) surface of hepatocytes.

In the liver of control mice originated from both low- and high-metabolic lines, after 15 weeks of the experiment, β-catenin maintained its membrane distribution, and the expression level was homogeneous (S1A, B Fig.). In the tumor-induced groups, intensified immunoreactivity and heterogeneous protein expression were observed during this time interval (S1C, D Fig.). The cellular localization of β-catenin affected both the cell membrane and the cytoplasm of hepatocytes. However, the number of cells with cytoplasmic localization of β-catenin and reaction intensity in the high-BMR line was considerably greater (S1C, D Fig.).

The intensity of the reaction and localization of β-catenin in the liver of control group animals after 35 weeksof the experiment is similar to that in the previous time interval (S2A, B Fig.). In the liver of DEN-treated mice characterized by low metabolism, a significant weakening of immunoreactivity was observed both in comparison to controls and animals of the experimental group in the previous time point (S2C Fig.). Whereas high metabolism resulted in a further increase in β-catenin expression, especially in the cytoplasmic location of hepatocytes, with reduced membrane protein immunoreactivity (S2D Fig.).

After 45 weeks of the experiment, β-catenin immunoreactivity in the liver of control mice with low metabolism did not change (S3A Fig.), while in the liver parenchyma of mice with high metabolism it was weakened compared to the previous control groups (S3B Fig.). A significantly weakened IHC reaction to β-catenin, compared to the control and tumor group at the previous time point, was observed in the liver of L-BMR mice. The expression of β-catenin in this study group was highly diverse regarding cell number and intensity of the immunocytochemical reaction. A very weak membrane IHC pattern predominated, although immunopositive cells with cytoplasmic localization of β-catenin were also visible (S3C Fig.). The livers of H-BMR mice were characterized by a high diversity in terms of β-catenin intensity and localization. Membrane localization predominated, especially in the apical surface of the hepatocyte, although a few cells with cytoplasmic localization of the immunosignal were also observed (S3D Fig.).

S1 Table. A number of animals planned for the experiment and actually taken for the autopsy at a specific time point due to natural or experimental mortality.

| **Time point** | **LBMR CONT** | | **LBMR DEN** | | **HBMR CONT** | | **HBMR DEN** | |
| --- | --- | --- | --- | --- | --- | --- | --- | --- |
|  | Plan | Autopsy | Plan | Autopsy | Plan | Autopsy | Plan | Autopsy |
| Week 0 | 8 | 8 | - | - | 8 | 8 | - | - |
| Week 15th | 12 | 12 | 12 | 12 | 12 | 10 | 12 | 8 |
| Week 35th | 12 | 10 | 12 | 12 | 12 | 7 | 12 | 8 |
| Week 45th | 12 | 11 | 12 | 11 | 12 | 7 | 12 | 8 |
| **Sum** | **44** | **41** | **36** | **35** | **44** | **32** | **36** | **24** |
| **Total mortality** | **-** | **3** | **-** | **1** | **-** | **12** | **-** | **12** |

S2 Table. Average values ± SE for BMR, liver masses, hepatocyte size, and protein concentration in mice enforced the development of hepatocellular carcinoma (Tumor) and control groups at three chosen time points (week 15, 35, 45) for individuals characterized by low or high basal metabolic rate.

|  | Low BMR line | | | | | | High BMR line | | | | | |
| --- | --- | --- | --- | --- | --- | --- | --- | --- | --- | --- | --- | --- |
|  | Week 15 | | Week 35 | | Week 45 | | Week 15 | | Week 35 | | Week 45 | |
|  | Control | Tumor | Control | Tumor | Control | Tumor | Control | Tumor | Control | Tumor | Control | Tumor |
| BMR  (ml O2/h) | 40.74±0.68 | | | | | | 70.54±0.68 | | | | | |
| Liver mass (g) | 1.70±0.12 | 2.14±0.12 | 1.72±0.13 | 2.21±0.12 | 1.73±0.14 | 1.80±0.11 | 2.19±0.13 | 3.40±0.14 | 2.12±0.15 | 3.07±0.14 | 2.39±0.15 | 2.64±0.14 |
| Hepatocyte size (μm2) | 481.3±6.94 | 544.3±6.94 | 489.5±7.61 | 531.2±6.94 | 471.5±8.50 | 540.1±6.67 | 623.4±7.61 | 695.1±8.50 | 615.6±9.09 | 705.1±8.50 | 621.2±9.09 | 694.7±8.50 |
|  |  |  |  |  |  |  |  |  |  |  |  |  |
| Total protein (mg/ml) | 15.03±1.10 | 13.93±1.10 | 13.70±1.10 | 19.97±1.10 | 16.06±1.10 | 19.86±1.10 | 20.37±1.10 | 22.34±1.10 | 19.70±1.27 | 21.78±1.10 | 19.45±1.27 | 23.35±1.10 |
| β-catenin  (ng/ml) | 3.64±0.41 | 4.30±0.41 | 5.88±0.41 | 5.36±0.41 | 5.33±0.41 | 7.98±0.41 | 5.85±0.41 | 4.88±0.41 | 6.78±0.48 | 7.83±0.41 | 7.09±0.48 | 8.21±0.41 |
| mTOR  (pg/ml) | 221.9±25.6 | 318.1±25.6 | 236.2±25.6 | 272.3±25.6 | 202.2±25.6 | 243.8±25.6 | 246.6±25.6 | 323.2±25.6 | 280.5±29.6 | 272.0±25.6 | 240.0±29.6 | 369.0±25.6 |

S3 Table. Average values ± SE for histopathological markers in mice enforced the development of hepatocellular carcinoma at three chosen time points (week 15, 35, 45) for individuals characterized by low or high basal metabolic rate. To analyze tumorigenic changes, four steps scale was used, with: “1” – little (up to 33% of the sample area), “2” – average (up to 66% of the sample area), and “3” – lot of (up to 99% of the sample area); NI – stands for “no index” (visual lack of index change on histopathological slide).

|  | Low BMR line | | | High BMR line | | |
| --- | --- | --- | --- | --- | --- | --- |
|  | Week 15 | Week 35 | Week 45 | Week 15 | Week 35 | Week 45 |
| Tumor foci /10mm2 | NI | 0.13±0.35 | 1.62±0.41 | NI | 1.63±0.34 | 3.38±0.42 |
| Atypic cell /1mm2 | NI | 10.12±0.84 | 10.75±0.28 | 1.50±0.61 | 13.38±0.61 | 14.87±0.84 |
| Necrosis | 1.25±0.21 | 1.75±0.21 | 1.13±0.21 | 1.00±0.21 | 1.50±0.21 | 1.25±0.21 |
| Apoptosis | 0.88±0.26 | 0.38±0.26 | NI | 0.38±0.26 | 1.13±0.26 | 1.00±0.26 |
| Pro-inflammatory influx | 0.38±0.20 | 0.63±0.20 | NI | 0.25±0.20 | 0.88±0.20 | 0.75±0.20 |
| Atypia | NI | 1.50±0.16 | 2.00±0.16 | 0.13±0.16 | 2.13±0.16 | 2.88±0.16 |
| Cancer cells | NI | 0.13±0.24 | 1.25±0.24 | 0.13±0.24 | 1.00±0.24 | 2.00±0.24 |

S4 Table. Three-way ANOVA results for chosen histopathological markers in mice artificially selected for low or high basal metabolic rate and enforced to develop hepatocellular carcinoma. NC – no change.

|  | *ANOVA* | | | | | | | | | | | | | *Change direction in high BMR line* |
| --- | --- | --- | --- | --- | --- | --- | --- | --- | --- | --- | --- | --- | --- | --- |
|  | df | Line effect | | Treat effect | | Time effect | | Line x Treat | | Line x Time | | Treat x Time | |  |
|  |  |  |  |  |  |  |  |  |  |  |  |  |  |  |
| Necrosis | 80 | F=0.24 | p=0.62 | F=106.7 | **p<0.001** | F=1.52 | p=0.22 | F=0.24 | p=0.62 | F=0.24 | p=0.79 | F=1.52 | p=0.22 | NC |
| Apoptosis | 80 | F=2.15 | p=0.15 | F=6.42 | **p=0.01** | F=1.22 | p=0.30 | F=1.44 | p=0.23 | F=0.89 | p=0.41 | F=1.64 | p=0.20 | NC |
| Pro-inflammatory influx | 80 | F=4.39 | **p=0.039** | F=10.85 | **p=0.001** | F=0.63 | p=0.53 | F=0.18 | p=0.68 | F=1.67 | p=0.19 | F=2.49 | p=0.09 | increase |

S5 Table. The average fold change of expression of chosen genes in experimental groups compared to untreated control (2-ΔΔCt was approximately equal to one for all controls, see Material and Methods). The values over one stand for over-expression and below one for downregulation. The effect of DEN treatment on the expression of chosen genes was significant for most of the cases (p<0.05); NS (not significant) stands for exceptions (p>0.05). T-test statistics for between-line differences at specific time points are provided.

| Name | Gene expression fold change (2-ΔΔCt) | | | | | |  | Line effect | | | | | |
| --- | --- | --- | --- | --- | --- | --- | --- | --- | --- | --- | --- | --- | --- |
| Low BMR line | | | High BMR line | | |  | Week 15 | | Week 35 | | Week 45 | |
| Week 15 | Week 35 | Week 45 | Week 15 | Week 35 | Week 45 |  | *t* | *p* | *t* | *p* | *t* | *p* |
| *IGF-1* | 0.25 | 0.12 | 18.78 | 0.42 | 0.10 | 17.07 |  | *1.27* | 0.22 | *-0.37* | 0.71 | *-0.49* | 0.63 |
| *PI3K* | 9.80 | 1.95 | 1.25NS | 14.52 | 4.14 | 0.96NS |  | *2.45* | **0.025** | *0.68* | **0.004** | *-1.40* | 0.18 |
| *mTOR* | 53.35 | 5.12 | 1.93 | 12.64 | 8.34 | 3.35 |  | *-2.90* | **0.009** | *0.84* | **0.047** | *1.81* | **0.017** |
| *APC* | 0.80NS | 0.07 | 0.82NS | 0.76NS | 0.07 | 0.40 |  | *-0.28* | 0.79 | *-0.10* | 0.92 | *-2.69* | **0.015** |
| *CTNNB1* | 3.30 | 1.22NS | 0.92NS | 6.88 | 0.74NS | 3.96 |  | *2.34* | **0.031** | *-0.93* | 0.36 | *4.74* | **<0.001** |
| *p-53* | 0.15 | 1.82NS | 1.40NS | 0.24 | 5.33 | 2.71 |  | *2.44* | **0.025** | *4.31* | **<0.001** | *5.05* | **<0.0001** |
| *c-myc* | 5.31 | 3.71 | 0.88NS | 9.65 | 3.61 | 4.14 |  | *2.57* | **0.019** | *-1.15* | 0.91 | *2.57* | **0.020** |
