# Supplementary material for: Basal Metabolic Rate shapes the development and progression of hepatocellular carcinoma
Source: Research Square preprint supplement (doi:10.21203/rs.3.rs-6046205/v1), 2025-04-24
Supplement: Supplementary file 2 [file e12983eca3bf1daef632b698.docx]

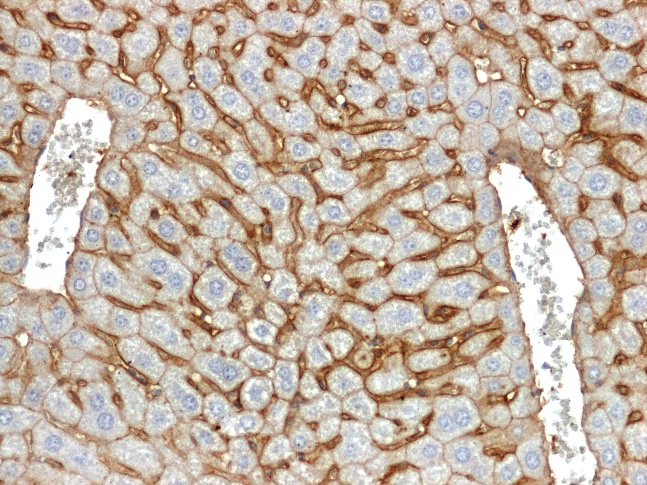


**B**


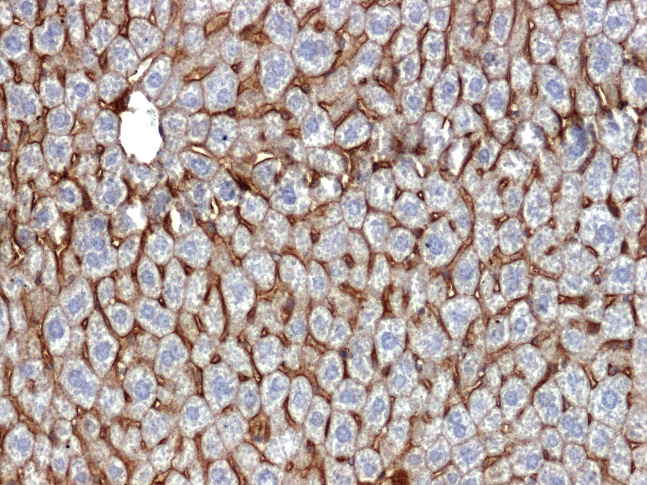


**A**


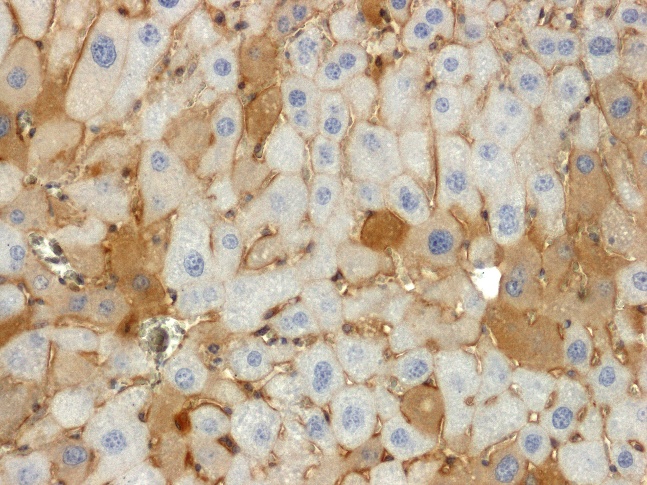


**D**


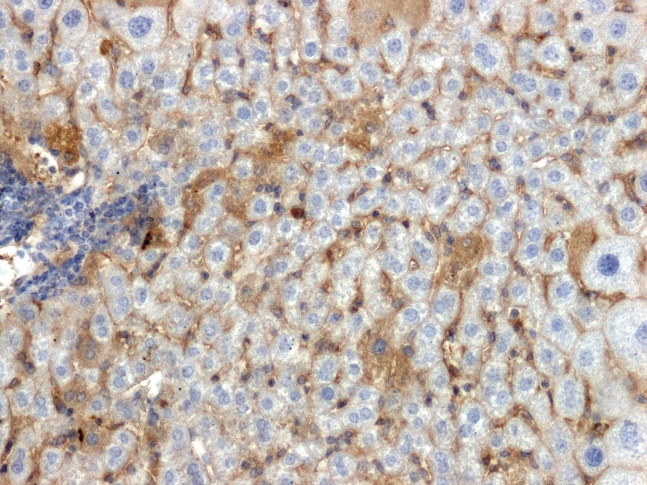


**C**

**S1 Fig. Immunohistology of liver’s hepatocyte during HCC development.** Representative photomicrographs for immunodetection of β-catenin in the liver of mice at 15th week of hepatocellular carcinoma development: A) L-BMR control group, B) H-BMR control group, C) L-BMR DEN-treated group, D) H-BMR DEN-treated group. Magnification x200.


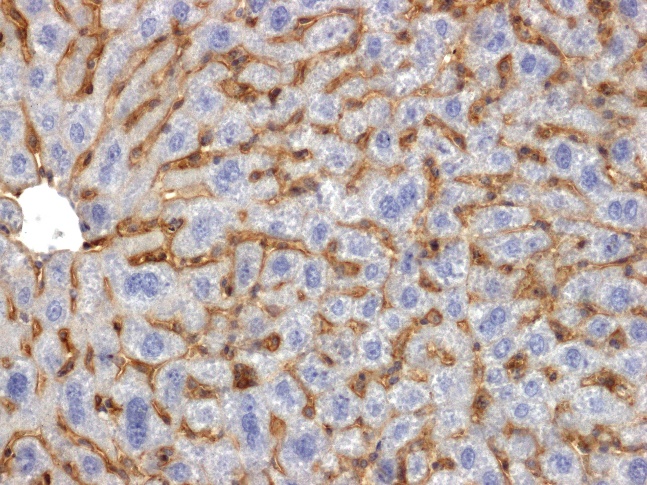


**B**


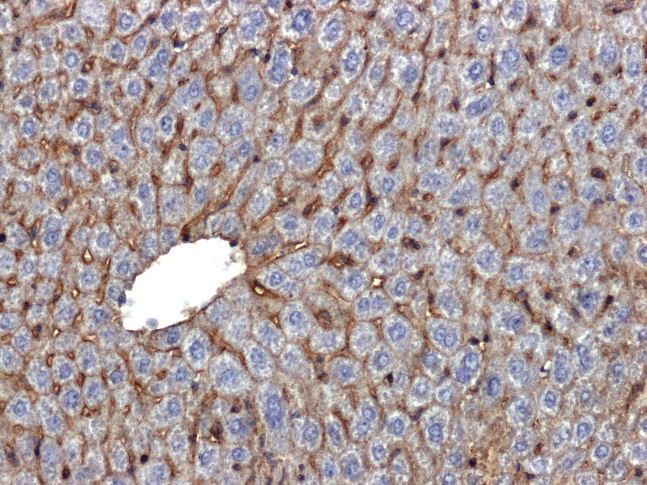


**A**


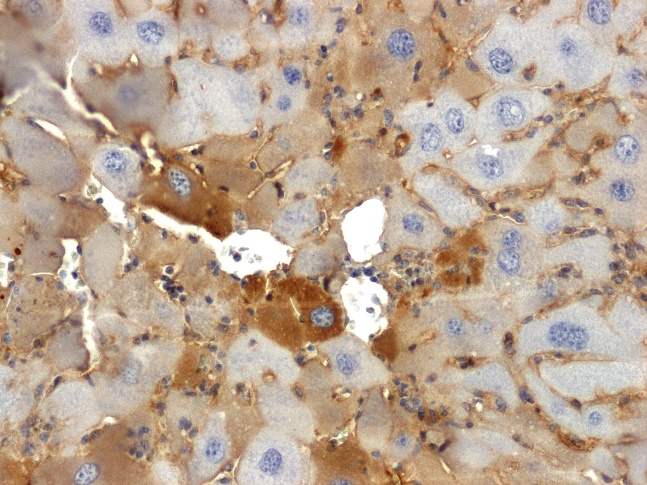


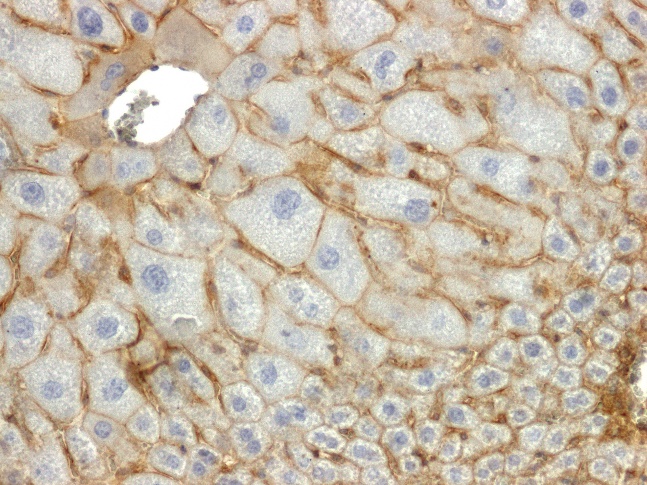


**C**

**D**

**S2 Fig. Immunohistology of liver’s hepatocyte during HCC development cont.** Representative photomicrographs of β-catenin immunoreactivity in the liver of mice at 35th week of hepatocellular carcinoma development: A) L-BMR control group, B) H-BMR control group, C) L-BMR DEN-treated group, D) H-BMR DEN-treated group. Magnification x200.


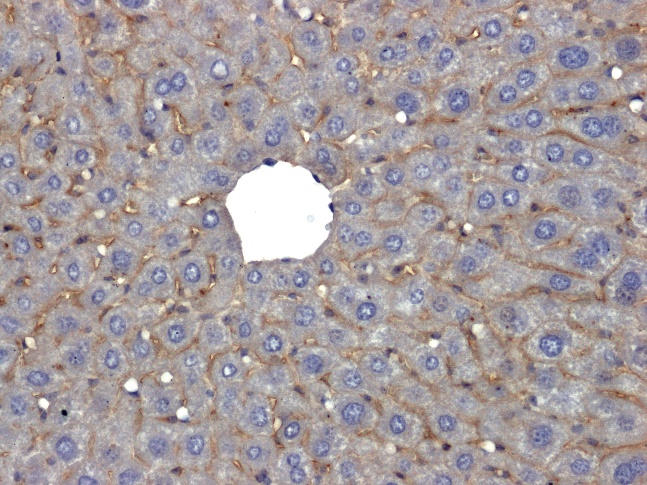


**B**


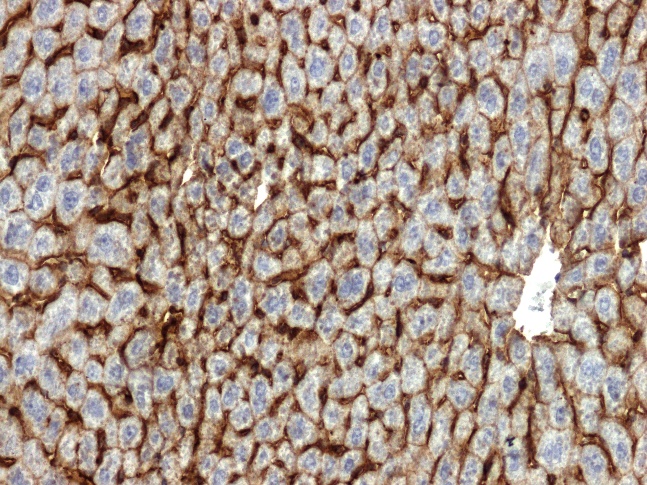


**A**


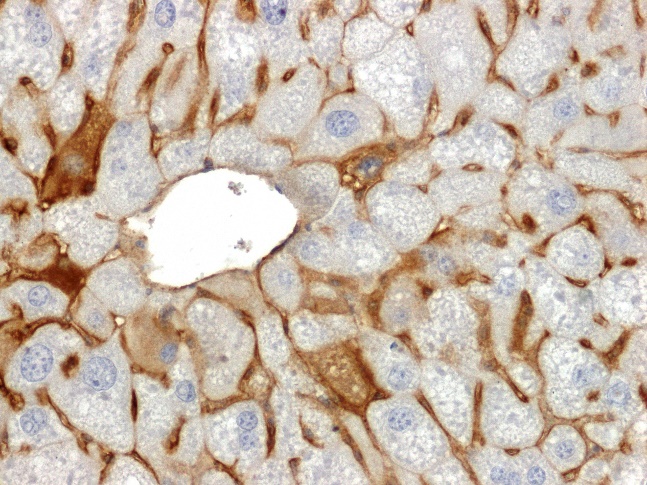


**D**


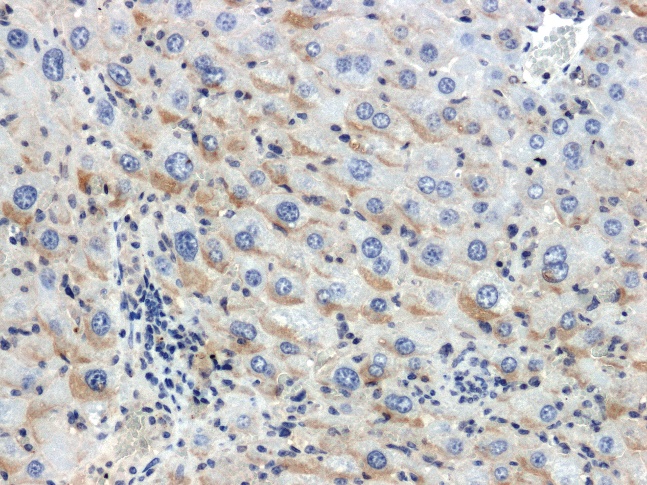


**C**

**S3 Fig. Immunohistology of liver’s hepatocyte during HCC development cont.** Representative photomicrographs of β-catenin immunolocalization in the liver of mice at 45th week of hepatocellular carcinoma development: A) L-BMR control group, B) H-BMR control group, C) L-BMR DEN-treated group, D) H-BMR DEN-treated group. Magnification x200.
